# Supplementary material
Source: PubMed Central journal article supplement (PMC5479490)
Supplement: NIHMS865199-supplement-supplement_1.pdf [file NIHMS865199-supplement-supplement_1.pdf]

**Supplemental Table 1. Results of linear regression analyses examining exposure and timing of first exposure to specific types of child maltreatment and other interpersonal violence on depressive symptoms, adjusting for covariates, and frequency of exposure**

|                                     | N (%)       | Model 2 (partial adjustment) |               | Model 3 (full adjustment) |               |
|-------------------------------------|-------------|------------------------------|---------------|---------------------------|---------------|
|                                     |             | Beta                         | 95% CI        | Beta                      | 95% CI        |
| <b>Child Maltreatment</b>           |             |                              |               |                           |               |
| Violence between Caregivers         | 897 (31.0)  |                              |               |                           |               |
| Early Childhood                     | 235 (26.2)  | 0.374                        | (0.23, 0.51)  | 0.095                     | (-0.04, 0.23) |
| Middle Childhood                    | 469 (52.3)  | 0.328                        | (0.22, 0.43)  | 0.094                     | (-0.01, 0.20) |
| Adolescence                         | 193 (21.5)  | 0.234                        | (0.09, 0.38)  | 0.055                     | (-0.08, 0.19) |
| Physical Abuse                      | 555 (19.2)  |                              |               |                           |               |
| Early Childhood                     | 133 (24.0)  | 0.784 <sup>a</sup>           | (0.59, 0.98)  | 0.400                     | (0.21, 0.59)  |
| Middle Childhood                    | 311 (56.0)  | 0.523                        | (0.39, 0.66)  | 0.213                     | (0.08, 0.34)  |
| Adolescence                         | 111 (20.0)  | 0.610                        | (0.42, 0.80)  | 0.294                     | (0.11, 0.47)  |
| Emotional Abuse                     | 750 (25.9)  |                              |               |                           |               |
| Early Childhood                     | 112 (14.9)  | 0.511                        | (0.30, 0.72)  | 0.212                     | (0.01, 0.42)  |
| Middle Childhood                    | 325 (43.3)  | 0.498                        | (0.37, 0.63)  | 0.240 <sup>d</sup>        | (0.11, 0.37)  |
| Adolescence                         | 313 (41.7)  | 0.627                        | (0.51, 0.75)  | 0.448                     | (0.33, 0.57)  |
| Sexual abuse                        | 878 (30.4)  |                              |               |                           |               |
| Early Childhood                     | 128 (14.6)  | 0.771 <sup>b</sup>           | (0.59, 0.95)  | 0.437                     | (0.26, 0.61)  |
| Middle Childhood                    | 387 (44.1)  | 0.518                        | (0.40, 0.63)  | 0.287                     | (0.18, 0.40)  |
| Adolescence                         | 363 (41.3)  | 0.473                        | (0.36, 0.58)  | 0.268                     | (0.16, 0.38)  |
| <b>Other Interpersonal Violence</b> |             |                              |               |                           |               |
| Family/friend Murdered              | 1560 (53.9) |                              |               |                           |               |
| Early Childhood                     | 26 (1.7)    | 0.083                        | (-0.30, 0.47) | -0.088                    | (-0.45, 0.27) |
| Middle Childhood                    | 186 (11.8)  | 0.293                        | (0.13, 0.46)  | 0.138                     | (-0.02, 0.29) |
| Adolescence                         | 564 (36.2)  | 0.162                        | (0.05, 0.27)  | 0.055                     | (-0.05, 0.16) |
| Adulthood                           | 784 (50.3)  | 0.197                        | (0.10, 0.29)  | 0.121                     | (0.03, 0.21)  |
| Witness Attack (Family/ friend)     | 1220 (42.2) |                              |               |                           |               |
| Early Childhood                     | 77 (6.3)    | 0.461                        | (0.23, 0.69)  | 0.151                     | (-0.07, 0.38) |
| Middle Childhood                    | 252 (20.7)  | 0.448                        | (0.31, 0.59)  | 0.211                     | (0.07, 0.35)  |

|                                    |             |       |              |       |               |
|------------------------------------|-------------|-------|--------------|-------|---------------|
| Adolescence                        | 476 (39.0)  | 0.261 | (0.16, 0.37) | 0.095 | (-0.01, 0.20) |
| Adulthood                          | 415 (34.0)  | 0.271 | (0.17, 0.38) | 0.160 | (0.06, 0.26)  |
| Witness Attack (non-family/friend) | 1271 (44.0) |       |              |       |               |
| Early Childhood                    | 40 (3.1)    | 0.354 | (0.03, 0.67) | 0.031 | (-0.27, 0.33) |
| Middle Childhood                   | 201 (15.8)  | 0.359 | (0.20, 0.52) | 0.123 | (-0.03, 0.28) |
| Adolescence                        | 547 (43.1)  | 0.292 | (0.19, 0.39) | 0.125 | (0.03, 0.22)  |
| Adulthood                          | 483 (38.0)  | 0.232 | (0.13, 0.33) | 0.103 | (0.01, 0.20)  |

The table presents results from Models 2 and 3, which examined age of first exposure for individual trauma events (early childhood = age 0-5, middle childhood = age 6-10, adolescence = age 11-18, adulthood = age 19+) on depressive symptoms (z-score standardized). Model 2 (partial adjustment) controlled age, sex, education, income, employment status, and frequency of each trauma event occurrence (0=low frequency; 1=high reported number of occurrences of that trauma exposure). Model 3 (full adjustment) controlled for all covariates included in Model 2 plus exposure to other any specific type of traumatic event. Each trauma type was examined separately, thus the table includes results of eight separate multiple regression models (two for each exposure). Beta coefficients and 95% confidence intervals (CI) indicate effects for developmental timing of exposure relative to the reference of never exposed in any developmental period. Effects are significant at  $p < 0.05$  when the CI does not include 0.

<sup>a</sup> refers to a significant difference ( $p < 0.05$ ) between early childhood versus middle childhood.

<sup>b</sup> refers to a significant difference ( $p < 0.05$ ) between early childhood versus adolescence.

<sup>c</sup> refers to a significant difference ( $p < 0.05$ ) between early childhood versus adulthood.

<sup>d</sup> refers to a significant difference ( $p < 0.05$ ) between middle childhood versus adolescence.

<sup>e</sup> refers to a significant difference ( $p < 0.05$ ) between middle childhood versus adulthood.

**Supplemental Table 2. Results of linear regression analyses examining exposure and timing of first exposure to specific types of child maltreatment and other interpersonal violence on PTSD symptoms, adjusting for covariates, and frequency of exposure**

|                                     | N (%)       | Model 2 (partial adjustment) |               | Model 3 (full adjustment) |               |
|-------------------------------------|-------------|------------------------------|---------------|---------------------------|---------------|
|                                     |             | Beta                         | 95% CI        | Beta                      | 95% CI        |
| <b>Child Maltreatment</b>           |             |                              |               |                           |               |
| Violence between Caregivers         | 897 (31.0)  |                              |               |                           |               |
| Early Childhood                     | 235 (26.2)  | 0.408                        | (0.27, 0.55)  | 0.067                     | (-0.06, 0.20) |
| Middle Childhood                    | 469 (52.3)  | 0.306                        | (0.20, 0.41)  | 0.023                     | (-0.08, 0.12) |
| Adolescence                         | 193 (21.5)  | 0.248                        | (0.10, 0.39)  | 0.032                     | (-0.10, 0.16) |
| Physical abuse                      | 555 (19.2)  |                              |               |                           |               |
| Early Childhood                     | 133 (24.0)  | 0.702                        | (0.51, 0.90)  | 0.278                     | (0.09, 0.46)  |
| Middle Childhood                    | 311 (56.0)  | 0.584                        | (0.45, 0.72)  | 0.236                     | (0.11, 0.36)  |
| Adolescence                         | 111 (20.0)  | 0.574                        | (0.39, 0.76)  | 0.242                     | (0.07, 0.42)  |
| Emotional Abuse                     | 750 (25.9)  |                              |               |                           |               |
| Early Childhood                     | 112 (14.9)  | 0.592                        | (0.38, 0.80)  | 0.213                     | (0.01, 0.41)  |
| Middle Childhood                    | 325 (43.3)  | 0.559                        | (0.43, 0.69)  | 0.231                     | (0.10, 0.36)  |
| Adolescence                         | 313 (41.7)  | 0.547                        | (0.43, 0.67)  | 0.322                     | (0.21, 0.44)  |
| Sexual abuse                        | 878 (30.4)  |                              |               |                           |               |
| Early Childhood                     | 128 (14.6)  | 0.954 <sup>a,b</sup>         | (0.78, 1.13)  | 0.598 <sup>a</sup>        | (0.43, 0.77)  |
| Middle Childhood                    | 387 (44.1)  | 0.588                        | (0.48, 0.70)  | 0.342                     | (0.23, 0.45)  |
| Adolescence                         | 363 (41.3)  | 0.618                        | (0.51, 0.73)  | 0.394                     | (0.29, 0.50)  |
| <b>Other Interpersonal Violence</b> |             |                              |               |                           |               |
| Family/friend Murdered              | 1560 (53.9) |                              |               |                           |               |
| Early Childhood                     | 26 (1.7)    | 0.095                        | (-0.29, 0.48) | -0.114                    | (-0.47, 0.24) |
| Middle Childhood                    | 186 (11.8)  | 0.290                        | (0.13, 0.45)  | 0.105                     | (-0.05, 0.26) |
| Adolescence                         | 564 (36.2)  | 0.270                        | (0.16, 0.38)  | 0.145                     | (0.04, 0.25)  |
| Adulthood                           | 784 (50.3)  | 0.221                        | (0.13, 0.31)  | 0.128                     | (0.04, 0.21)  |
| Witness Attack (Family/ friend)     | 1220 (42.2) |                              |               |                           |               |
| Early Childhood                     | 77 (6.3)    | 0.357                        | (0.12, 0.59)  | -0.023                    | (-0.24, 0.20) |
| Middle Childhood                    | 252 (20.7)  | 0.472                        | (0.33, 0.61)  | 0.179                     | (0.04, 0.31)  |

|                                    |             |       |              |        |               |
|------------------------------------|-------------|-------|--------------|--------|---------------|
| Adolescence                        | 476 (39.0)  | 0.354 | (0.25, 0.46) | 0.139  | (0.04, 0.29)  |
| Adulthood                          | 415 (34.0)  | 0.328 | (0.22, 0.43) | 0.182  | (0.08, 0.28)  |
| Witness Attack (non-family/friend) | 1271 (44.0) |       |              |        |               |
| Early Childhood                    | 40 (3.1)    | 0.392 | (0.07, 0.71) | -0.022 | (-0.32, 0.27) |
| Middle Childhood                   | 201 (15.8)  | 0.362 | (0.20, 0.52) | 0.060  | (-0.09, 0.21) |
| Adolescence                        | 547 (43.1)  | 0.325 | (0.22, 0.43) | 0.113  | (0.02, 0.21)  |
| Adulthood                          | 483 (38.0)  | 0.328 | (0.23, 0.43) | 0.163  | (0.07, 0.26)  |

The table presents results from Models 2 and 3, which examined age of first exposure for individual trauma events (early childhood = age 0-5, middle childhood = age 6-10, adolescence = age 11-18, adulthood = age 19+) on PTSD symptoms (z-score standardized). Model 2 (partial adjustment) controlled age, sex, education, income, employment status, and frequency of each trauma event occurrence (0=low frequency; 1=high reported number of occurrences of that trauma exposure). Model 3 (full adjustment) controlled for all covariates included in Model 2 plus exposure to other any specific type of traumatic event. Each trauma type was examined separately, thus the table includes results of eight separate multiple regression models (two for each exposure). Beta coefficients and 95% confidence intervals (CI) indicate effects for developmental timing of exposure relative to the reference of never exposed in any developmental period. Effects are significant at  $p < 0.05$  when the CI does not include 0.

<sup>a</sup> refers to a significant difference ( $p < 0.05$ ) between early childhood versus middle childhood.

<sup>b</sup> refers to a significant difference ( $p < 0.05$ ) between early childhood versus adolescence.

<sup>c</sup> refers to a significant difference ( $p < 0.05$ ) between early childhood versus adulthood.

<sup>d</sup> refers to a significant difference ( $p < 0.05$ ) between middle childhood versus adolescence.

<sup>e</sup> refers to a significant difference ( $p < 0.05$ ) between middle childhood versus adulthood.
